# Supplementary material
Source: Springer Nature journal article supplement (https://www.springermedizin.de/resource/supplementary/12986_2009_231_MOESM2_ESM.pdf/25655638)

○ LETO, Standard    △ OLETF, Standard  
 ● LETO, High fat    ▲ OLETF, High fat

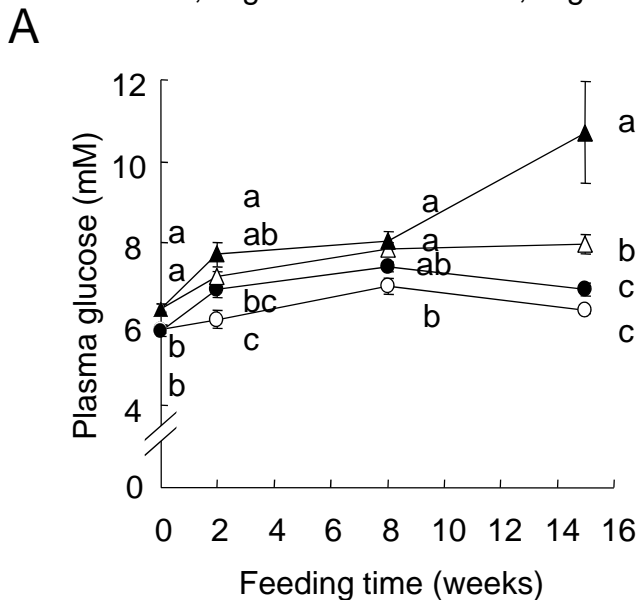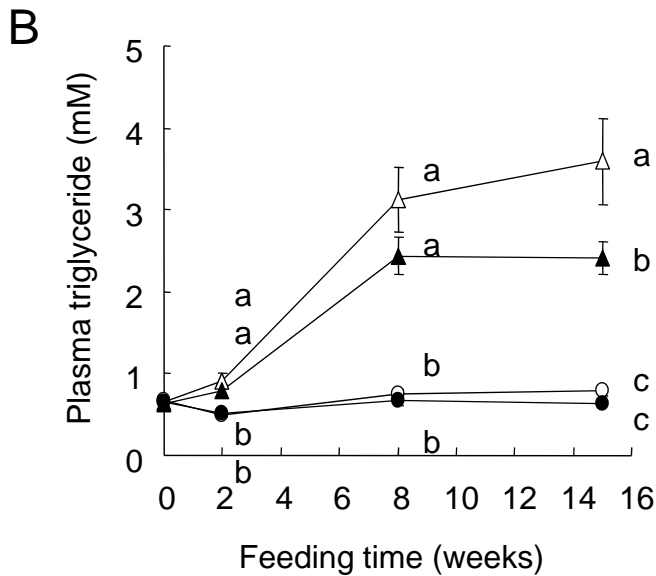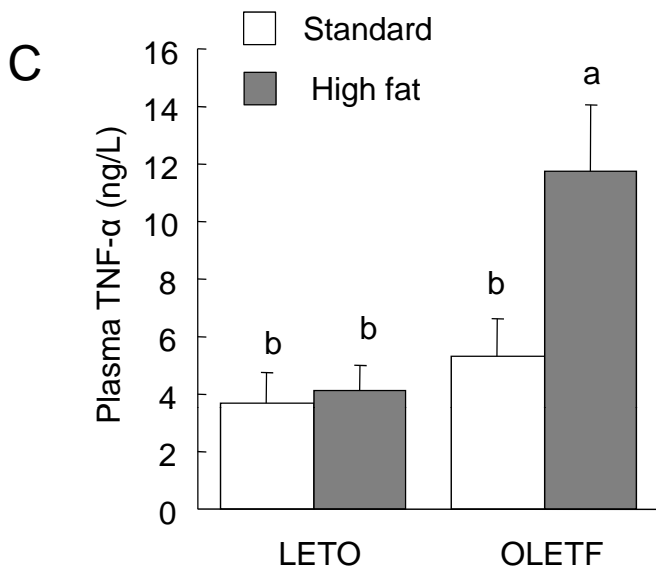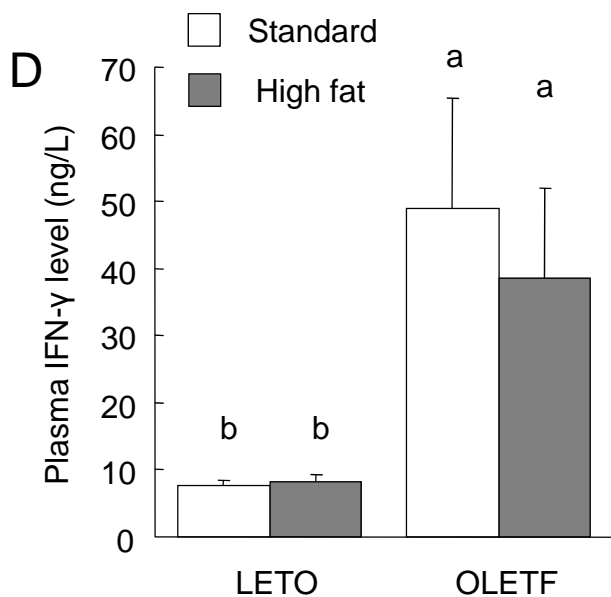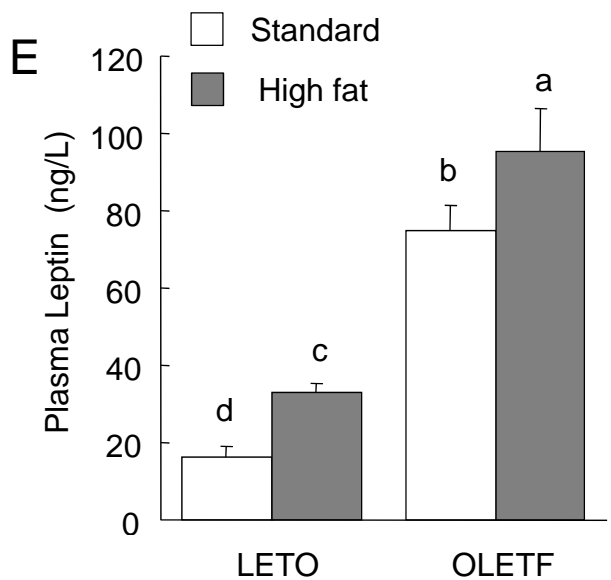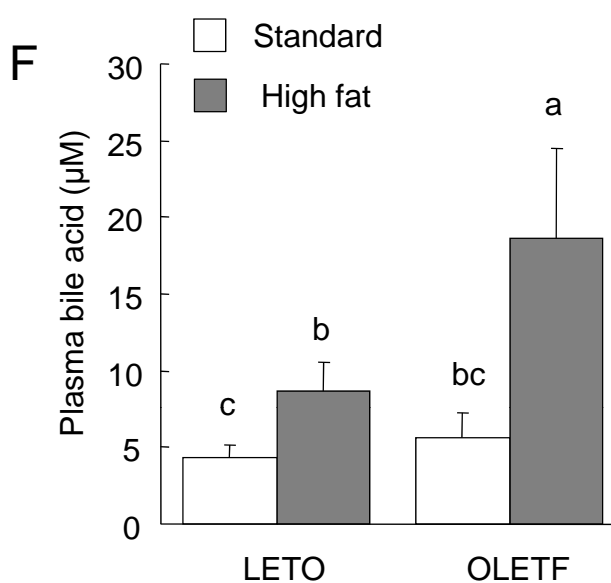

Supplement: MOESM2 [file 25655638]
